# Supplementary material for: Two zinc(II) supramolecular isomers of square grid networks formed by two flexible ligands: syntheses, structures and nonlinear optical properties
Source: Royal Society of Chemistry journal article supplement (doi:10.1039/b811498f), 2008-01-01
Supplement: b811498f.pdf [file b811498f.pdf]

## Supplementary Information for:

### Two zinc (II) supramolecular isomers of square grid networks formed by two flexible ligands: syntheses, structures and nonlinear optical properties

Guang-Xiang Liu\*, Kun Zhu, Hong Chen, Rong-Yi Huang and Xiao-Ming Ren

*Anhui Key Laboratory of Functional Coordination Compounds, School of Chemistry and Chemical Engineering, Anqing Normal University, Anqing 246003, P. R. China*

E-mail: [liugx@live.com](mailto:liugx@live.com)

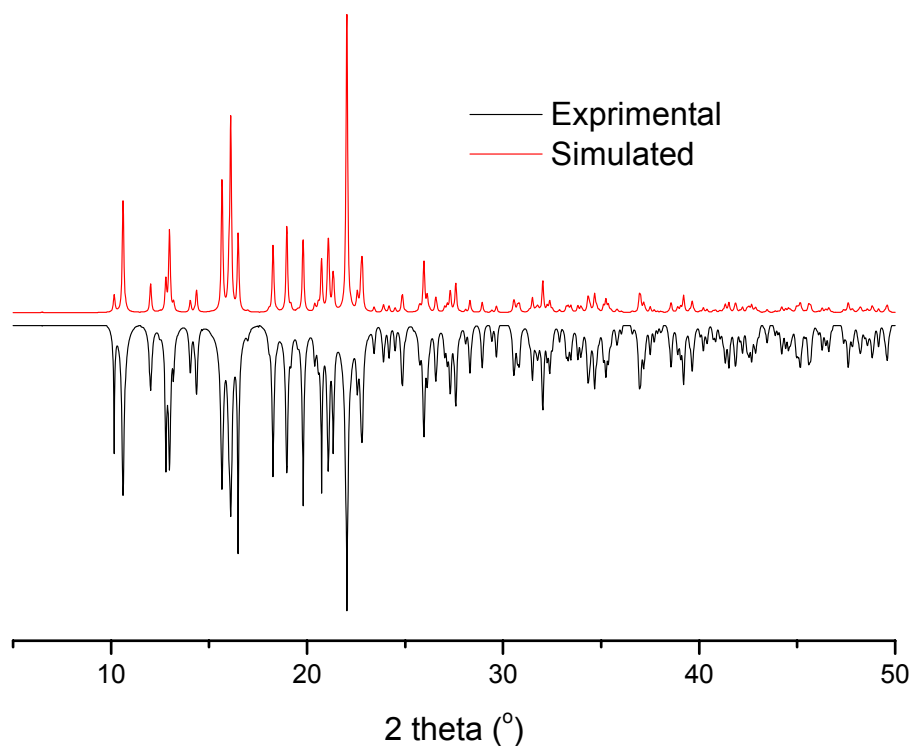

(a)

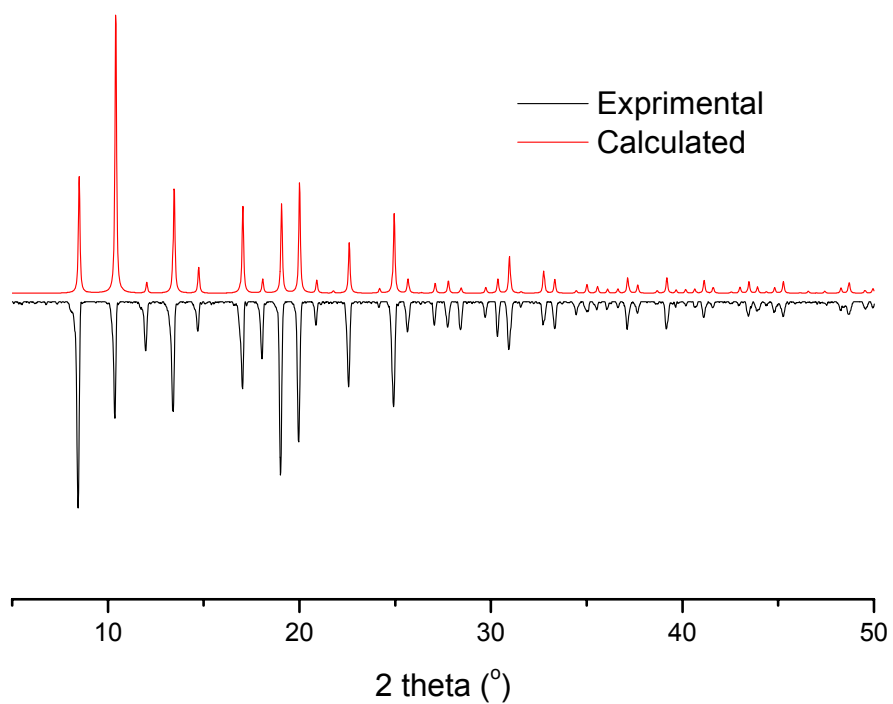

(b)

Figure S1. Calculated and experimental powder diffraction patterns for 1 (a) and 2

(b).

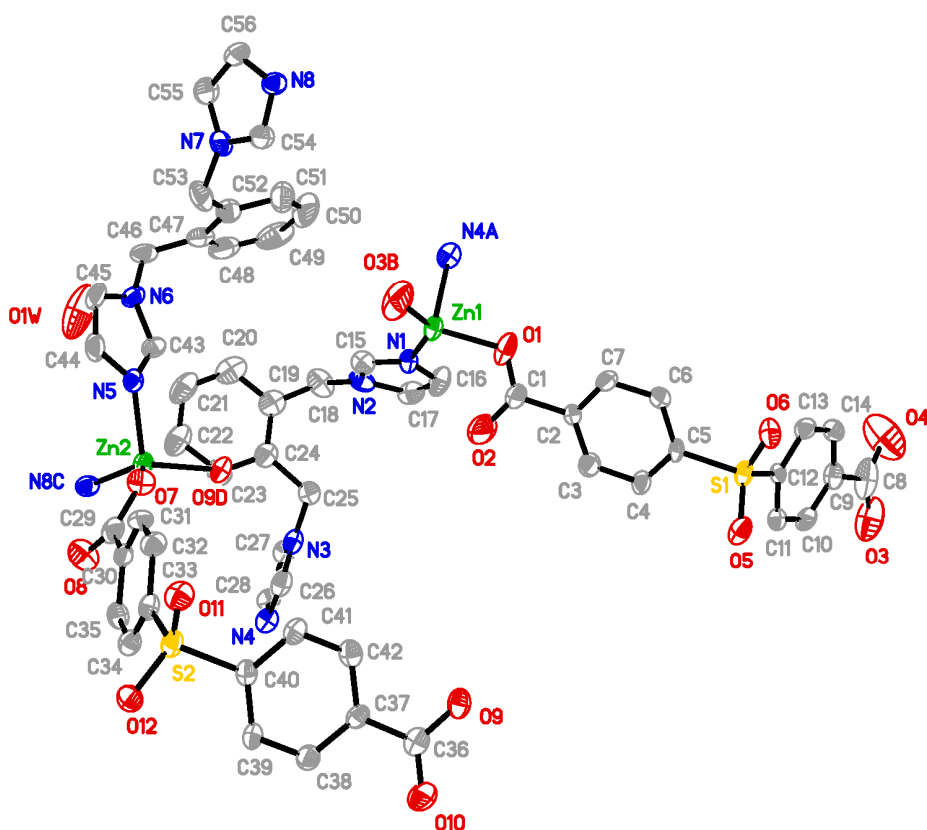

Figure S2. ORTEP drawing of the basic building unit in **2**, showing the coordination environment around the zinc atom with thermal ellipsoids at 30% probability. Hydrogen atoms and uncoordinated water molecules are omitted. Hydrogen atoms are omitted. Symmetry code: A =  $x, y-1, z$ ; B =  $x-1/2, 1-y, z$ ; C =  $x, 1+y, z$ ; D =  $1/2-x, y, 1/2+z$ .

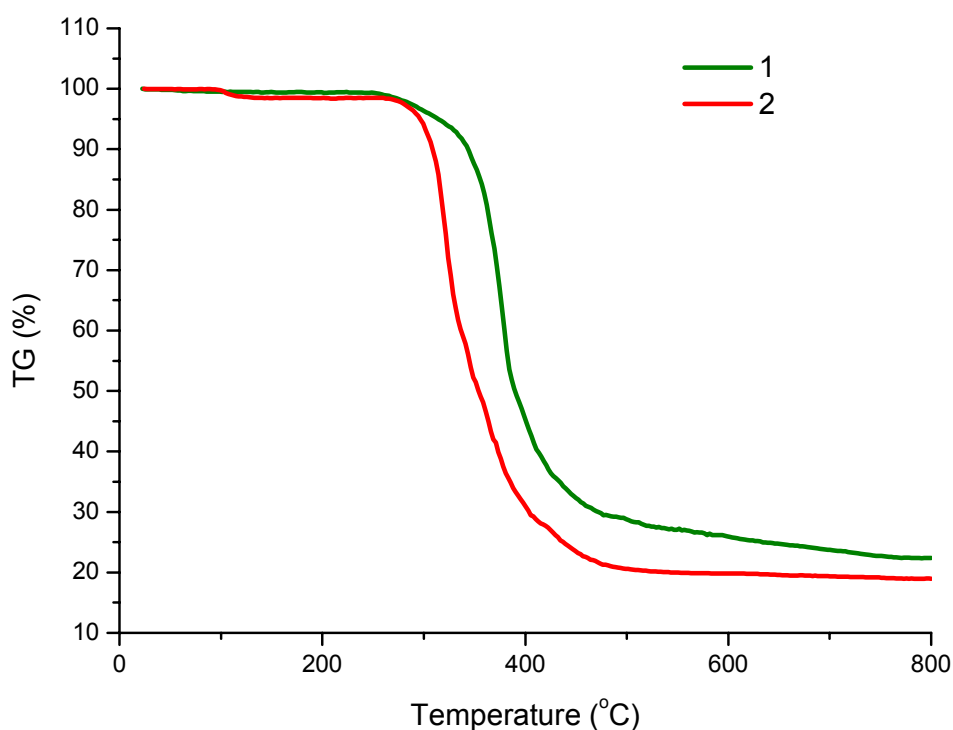

Figure S3. TG curve of complexes **1** and **2**.
